# Supplementary material
Source: MDPI journal article supplement (https://www.mdpi.com/2073-4352/6/5/49)
Supplement: s1 [file s1]

# Supplementary Materials: The Role of Coulombic Interactions for Spin Crossover Behaviors and Crystal Structural Transformation in Novel Anionic Fe(III) Complexes from a $\pi$ -Extended ONO Ligand

Suguru Murata, Kazuyuki Takahashi, Takahiro Sakurai, Hitoshi Ohta, Takashi Yamamoto, Yasuaki Einaga, Yoshihito Shiota and Kazunari Yoshizawa

Table S1. Cartesian coordinates of the HS  $[\text{Fe}(\text{aznp})_2]$  anion.

|   |             |             |             |
|---|-------------|-------------|-------------|
| C | 0.41109600  | 2.26279400  | 1.97710600  |
| C | 0.13475200  | 3.29434600  | 2.90799000  |
| H | -0.87899500 | 3.37896000  | 3.29022500  |
| C | 1.13940400  | 4.16761600  | 3.31128200  |
| H | 0.90684100  | 4.95561700  | 4.02577600  |
| C | 2.44973100  | 4.05020800  | 2.80690100  |
| H | 3.22471400  | 4.74235200  | 3.12767600  |
| C | 2.74674300  | 3.04284200  | 1.89293500  |
| H | 3.74653600  | 2.93063900  | 1.48568000  |
| C | 1.74392100  | 2.15239600  | 1.47896500  |
| C | 2.34284800  | -0.91201100 | -1.41089600 |
| C | 2.77435900  | -1.86859100 | -2.40073500 |
| H | 1.99363800  | -2.46463000 | -2.86514800 |
| C | 4.08939000  | -2.02328600 | -2.73358800 |
| H | 4.37909300  | -2.76000700 | -3.48174200 |
| C | 5.11489100  | -1.23686900 | -2.11770400 |
| C | 6.47929600  | -1.40257000 | -2.45960500 |
| H | 6.74000900  | -2.14928600 | -3.20820400 |
| C | 7.46517500  | -0.63896900 | -1.86069000 |
| H | 8.50975300  | -0.77595100 | -2.13064800 |
| C | 7.09883800  | 0.32076200  | -0.89119000 |
| H | 7.86715300  | 0.92462500  | -0.41249900 |
| C | 5.77230000  | 0.50167600  | -0.53859000 |
| H | 5.49919200  | 1.23656000  | 0.20973000  |
| C | 4.73977000  | -0.26614700 | -1.13814200 |
| C | 3.34174900  | -0.09789900 | -0.78326600 |
| C | -0.41213100 | -2.26626900 | 1.97388700  |
| C | -0.13634300 | -3.29920900 | 2.90333600  |
| H | 0.87702200  | -3.38411200 | 3.28643400  |
| C | -1.14096700 | -4.17358000 | 3.30398800  |
| H | -0.90878700 | -4.96276300 | 4.01725700  |
| C | -2.45084200 | -4.05590600 | 2.79845400  |
| H | -3.22580100 | -4.74900200 | 3.11714200  |
| C | -2.74739700 | -3.04708000 | 1.88605700  |
| H | -3.74680200 | -2.93461300 | 1.47794300  |
| C | -1.74451300 | -2.15554200 | 1.47466500  |
| C | -2.34199100 | 0.91350900  | -1.41058000 |
| C | -2.77310100 | 1.87182100  | -2.39893100 |
| H | -1.99207700 | 2.46815000  | -2.86252600 |
| C | -4.08819900 | 2.02804200  | -2.73113300 |

Table S1. *Cont.*

|    |             |             |             |
|----|-------------|-------------|-------------|
| H  | −4.37761800 | 2.76627400  | −3.47794600 |
| C  | −5.11403800 | 1.24132700  | −2.11619200 |
| C  | −6.47846000 | 1.40863600  | −2.45726400 |
| H  | −6.73893300 | 2.15685500  | −3.20447100 |
| C  | −7.46464300 | 0.64468800  | −1.85924300 |
| H  | −8.50924100 | 0.78290200  | −2.12854200 |
| C  | −7.09864700 | −0.31701400 | −0.89152300 |
| H  | −7.86724700 | −0.92112400 | −0.41358100 |
| C  | −5.77210300 | −0.49949200 | −0.53969400 |
| H  | −5.49923100 | −1.23581800 | 0.20730800  |
| C  | −4.73925100 | 0.26860500  | −1.13836000 |
| C  | −3.34126600 | 0.09887100  | −0.78415300 |
| Fe | −0.00003500 | −0.00063300 | 0.29043600  |
| N  | 1.90314600  | 1.09593700  | 0.56646800  |
| N  | 3.08707900  | 0.88903900  | 0.13140000  |
| N  | −1.90323200 | −1.09758200 | 0.56394200  |
| N  | −3.08695600 | −0.89005000 | 0.12854600  |
| O  | −0.50882600 | 1.42485800  | 1.56557700  |
| O  | 1.08197600  | −0.82830200 | −1.16942500 |
| O  | 0.50785200  | −1.42745700 | 1.56451500  |
| O  | −1.08109800 | 0.82880100  | −1.16919600 |

Table S2. Cartesian coordinates of the LS [Fe(aznp)<sub>2</sub>] anion.

|   |             |             |             |
|---|-------------|-------------|-------------|
| C | −0.51548100 | 2.42610800  | 2.03973000  |
| C | −0.41159000 | 3.40689000  | 3.05757300  |
| H | 0.53618500  | 3.92469100  | 3.17723500  |
| C | −1.50351100 | 3.68952700  | 3.86986300  |
| H | −1.40800300 | 4.44732100  | 4.64583900  |
| C | −2.73135400 | 3.01474100  | 3.70665300  |
| H | −3.57539900 | 3.25085500  | 4.35004500  |
| C | −2.85725300 | 2.04514900  | 2.71607300  |
| H | −3.78870600 | 1.50906200  | 2.56527100  |
| C | −1.76187100 | 1.75222900  | 1.89134900  |
| C | −1.72539000 | −1.14027900 | −1.24080600 |
| C | −1.93861400 | −2.15220800 | −2.24377100 |
| H | −1.10144300 | −2.35081300 | −2.90722800 |
| C | −3.11972900 | −2.82763500 | −2.35962800 |
| H | −3.23952600 | −3.58753300 | −3.13055600 |
| C | −4.21867000 | −2.55955300 | −1.48474400 |
| C | −5.44629900 | −3.25709800 | −1.60107700 |
| H | −5.54131700 | −4.01325100 | −2.37906100 |
| C | −6.50491300 | −2.99055600 | −0.75200900 |
| H | −7.44247000 | −3.53283000 | −0.85130300 |
| C | −6.35351400 | −2.00389400 | 0.24798800  |
| H | −7.18019700 | −1.78677600 | 0.92153600  |
| C | −5.16455900 | −1.30818800 | 0.38301000  |
| H | −5.05652100 | −0.55357400 | 1.15330800  |
| C | −4.06080700 | −1.56037400 | −0.47461000 |
| C | −2.80508300 | −0.84309900 | −0.35001200 |
| C | 0.51554200  | 2.42623600  | −2.03958900 |

Table S2. *Cont.*

|    |             |             |             |
|----|-------------|-------------|-------------|
| C  | 0.41167200  | 3.40706100  | −3.05739200 |
| H  | −0.53607600 | 3.92492300  | −3.17700300 |
| C  | 1.50358300  | 3.68967000  | −3.86970800 |
| H  | 1.40808900  | 4.44750100  | −4.64565000 |
| C  | 2.73139100  | 3.01480300  | −3.70657000 |
| H  | 3.57542600  | 3.25089000  | −4.34998500 |
| C  | 2.85726400  | 2.04515900  | −2.71603900 |
| H  | 3.78868800  | 1.50900300  | −2.56529800 |
| C  | 1.76189700  | 1.75227300  | −1.89128500 |
| C  | 1.72532300  | −1.14045300 | 1.24066400  |
| C  | 1.93849100  | −2.15250200 | 2.24351800  |
| H  | 1.10128100  | −2.35119400 | 2.90689900  |
| C  | 3.11961500  | −2.82791400 | 2.35938800  |
| H  | 3.23937500  | −3.58789500 | 3.13024100  |
| C  | 4.21861200  | −2.55971100 | 1.48461100  |
| C  | 5.44625600  | −3.25722300 | 1.60097300  |
| H  | 5.54123800  | −4.01345100 | 2.37888800  |
| C  | 6.50493500  | −2.99054500 | 0.75202900  |
| H  | 7.44250800  | −3.53278700 | 0.85135100  |
| C  | 6.35358500  | −2.00378100 | −0.24787400 |
| H  | 7.18032100  | −1.78654900 | −0.92132000 |
| C  | 5.16461200  | −1.30811100 | −0.38292800 |
| H  | 5.05661500  | −0.55341500 | −1.15315200 |
| C  | 4.06079300  | −1.56043700 | 0.47456400  |
| C  | 2.80505400  | −0.84319200 | 0.34994300  |
| Fe | −0.00000400 | 0.75494500  | 0.00000900  |
| N  | −1.73212700 | 0.79372200  | 0.86248100  |
| N  | −2.77943800 | 0.10440100  | 0.64725600  |
| N  | 1.73213300  | 0.79371400  | −0.86246500 |
| N  | 2.77943200  | 0.10436900  | −0.64726900 |
| O  | 0.48066500  | 2.12885300  | 1.24209900  |
| O  | −0.55951600 | −0.57352600 | −1.24094000 |
| O  | −0.48059100 | 2.12901500  | −1.24192600 |
| O  | 0.55945800  | −0.57368400 | 1.24081600  |

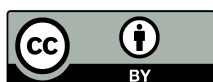

© 2016 by the authors; licensee MDPI, Basel, Switzerland. This article is an open access article distributed under the terms and conditions of the Creative Commons by Attribution (CC-BY) license (<http://creativecommons.org/licenses/by/4.0/>).
